# Supplementary material for: Photoisomerization of phytochrome chromophore models: an XMS-CASPT2 study
Source: Royal Society of Chemistry journal article supplement (doi:10.1039/d2cp04249e), 2022-01-01
Supplement: d2cp04249e1.pdf [file d2cp04249e1.pdf]

## Supplementary Information for

# Photoisomerization of phytochrome chromophore models: An XMS-CASPT2 study

Aditya G. Rao and Igor Schapiro

Dr. Igor Schapiro

Email: [igor.schapiro@mail.huji.ac.il](mailto:igor.schapiro@mail.huji.ac.il)

### Table of Contents:

|    |                                                                                                      |        |
|----|------------------------------------------------------------------------------------------------------|--------|
| 1. | Vertical excitation energies at various levels of theory                                             | 2 - 4  |
| 2. | Table of vertical excitation energies and oscillator strengths of both <i>Z</i> and <i>E</i> isomers | 5 – 6  |
| 3. | Excited state relaxed scans computed using XMS-CASPT2 for all models                                 | 7 - 11 |
| 4. | Summary of important parameters from LIICs of <i>Z</i> and <i>E</i>                                  | 12     |

## 1. Vertical excitation energies of the models

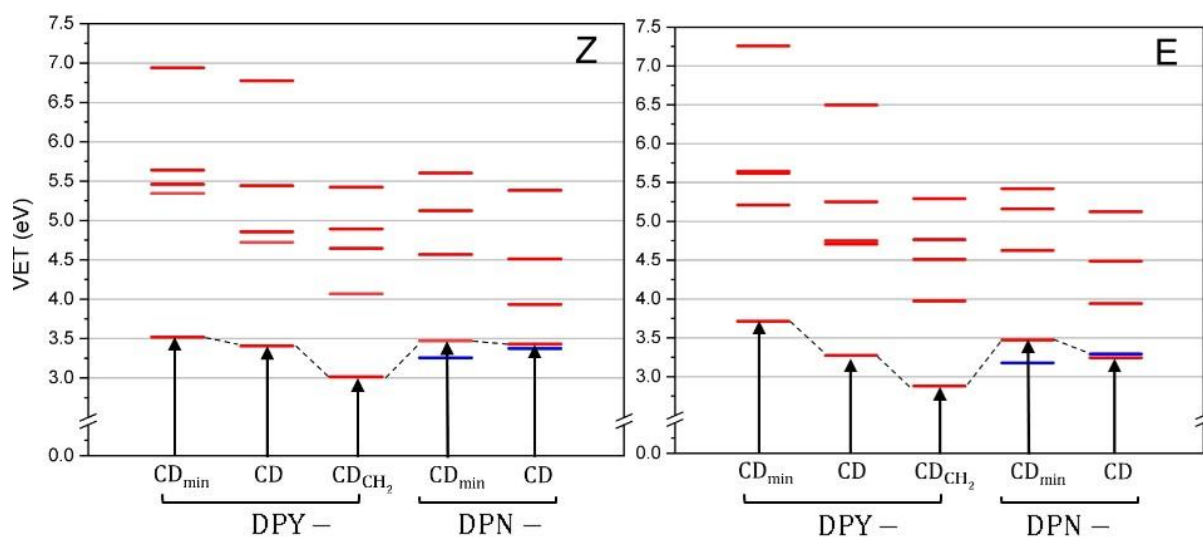

**Fig. S1.** Vertical excitation energies for all the models at the ADC(2) level of theory in the *Z* (left) and *E* (right) isomers.

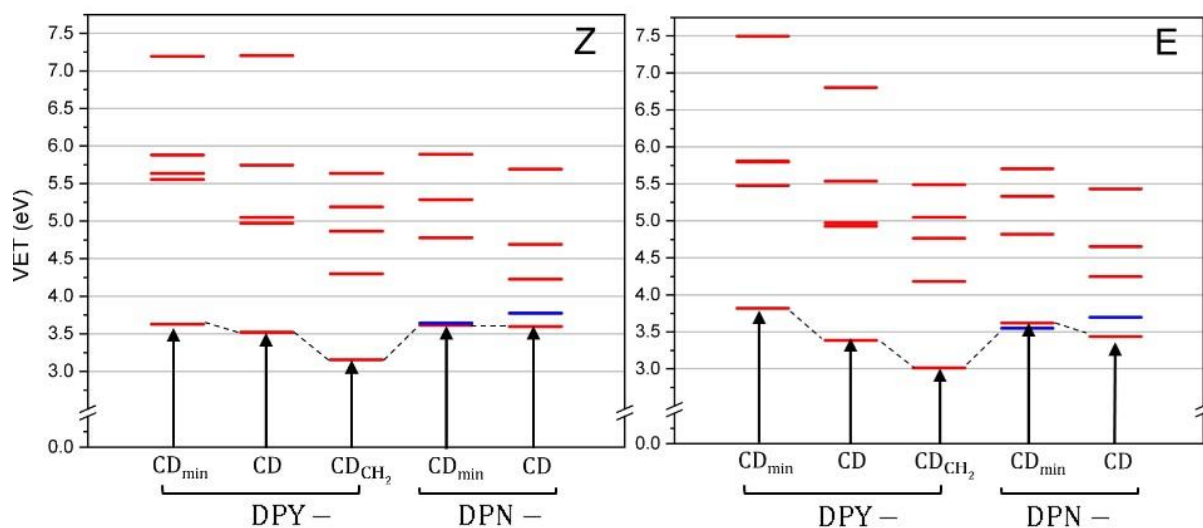

**Fig. S2.** Vertical excitation energies for all the models at the SCS-ADC(2) level of theory in the *Z* (left) and *E* (right) isomers.

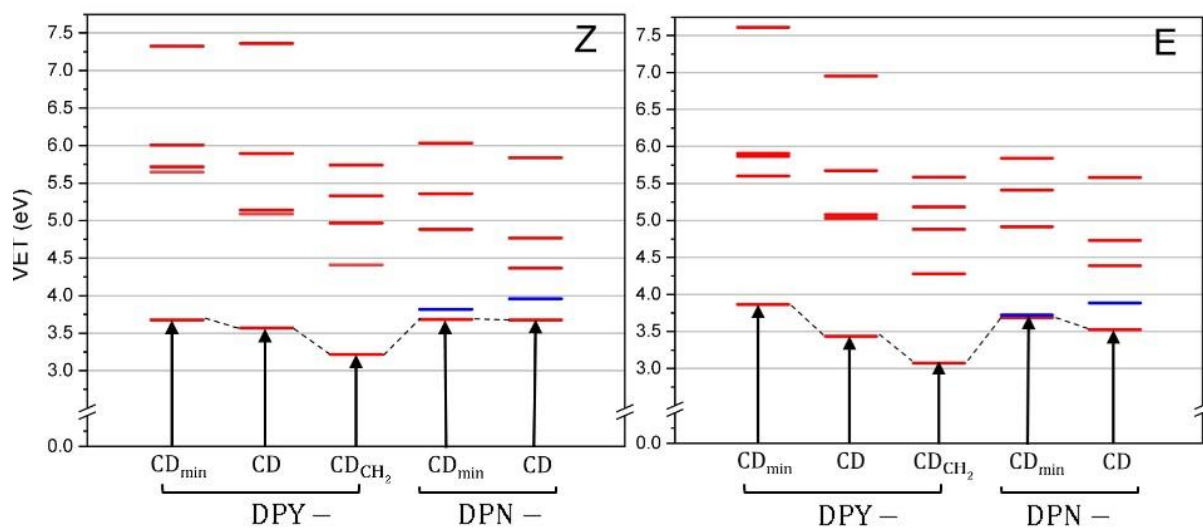

**Fig. S3.** Vertical excitation energies for all the models at the SOS-ADC(2) level of theory in the Z (left) and E (right) isomers.

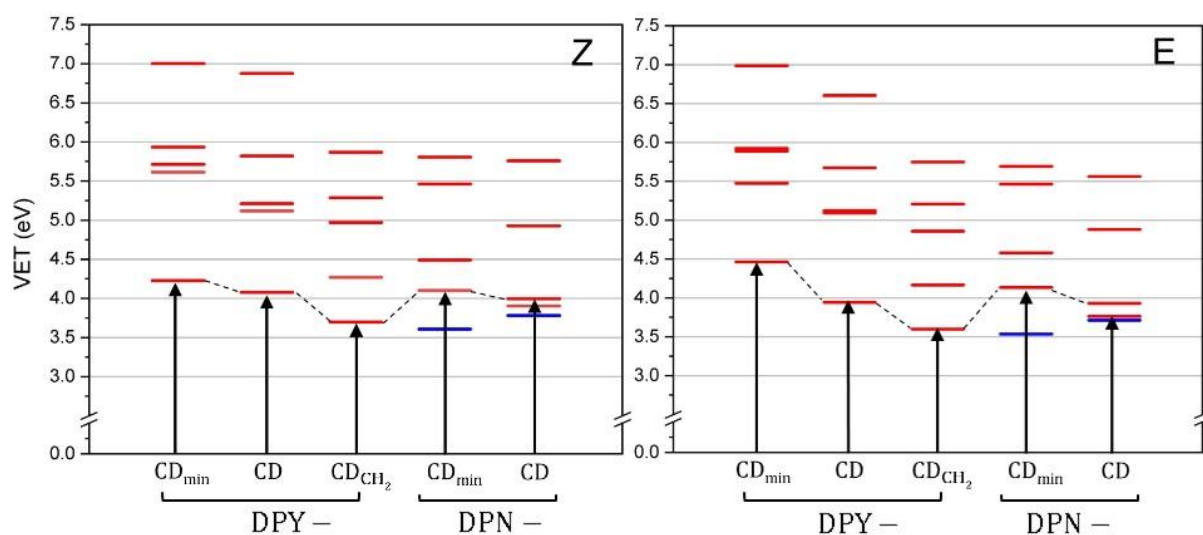

**Fig. S4.** Vertical excitation energies for all the models at the TD-CAM-B3LYP (TDA) level of theory in the Z (left) and E (right) isomers.

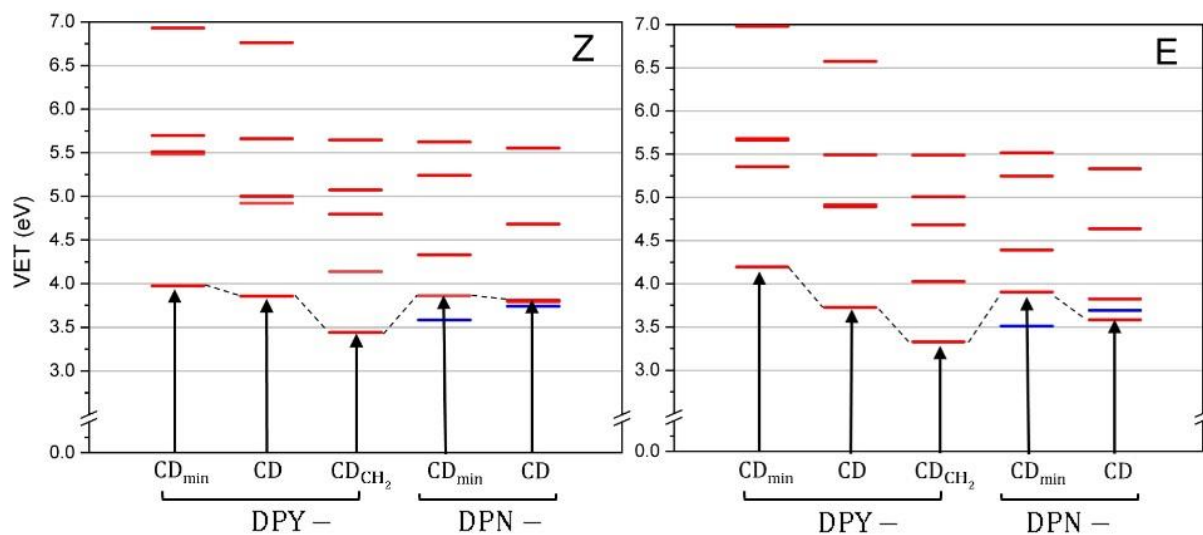

**Fig. S5.** Vertical excitation energies for all the models at the TD-CAM-B3LYP level of theory in the *Z* (left) and *E* (right) isomers.

## 2. Table of vertical excitation energies of models

**Table S1.** Vertical excitation energies (VET) in eV and oscillator strengths (f) for the models in the Z isomer. The  $n\pi^*$  and  $\pi\pi^*$  transitions are shown in blue and black, respectively.

| Model                     | XMS-<br>CASPT2 | CAM-<br>B3LYP | CAM-<br>B3LYP<br>(TDA) | ADC(2)      | SCS-<br>ADC(2) | SOS-<br>ADC(2) |
|---------------------------|----------------|---------------|------------------------|-------------|----------------|----------------|
|                           | VET (f)        | VET (f)       | VET (f)                | VET (f)     | VET (f)        | VET (f)        |
| DPY-<br>CD <sub>min</sub> | 3.40 (0.74)    | 3.98 (0.71)   | 4.23 (0.98)            | 3.52 (0.64) | 3.63 (0.66)    | 3.67 (0.67)    |
|                           | 4.93 (0.02)    | 5.48 (0.09)   | 5.61 (0.04)            | 5.34 (0.03) | 5.55 (0.06)    | 5.65 (0.09)    |
|                           |                | 5.51 (0.06)   | 5.71 (0.16)            | 5.46 (0.26) | 5.64 (0.23)    | 5.72 (0.22)    |
|                           |                | 5.70 (0.08)   | 5.93 (0.11)            | 5.64 (0.08) | 5.88 (0.08)    | 6.01 (0.08)    |
|                           |                | 6.93 (0.04)   | 7.00 (0.07)            | 6.94 (0.06) | 7.20 (0.04)    | 7.33 (0.03)    |
| DPY-<br>CD                | 3.25 (0.76)    | 3.86 (0.79)   | 4.08 (1.07)            | 3.41 (0.64) | 3.52 (0.67)    | 3.57 (0.68)    |
|                           | 4.55 (0.11)    | 4.92 (0.10)   | 5.12 (0.08)            | 4.72 (0.18) | 4.97 (0.23)    | 5.09 (0.26)    |
|                           |                | 5.00 (0.05)   | 5.21 (0.07)            | 4.85 (0.12) | 5.05 (0.10)    | 5.14 (0.07)    |
|                           |                | 5.66 (0.06)   | 5.82 (0.09)            | 5.44 (0.06) | 5.75 (0.07)    | 5.89 (0.07)    |
|                           |                | 6.76 (0.10)   | 6.87 (0.12)            | 6.77 (0.17) | 7.21(0.02)     | 7.36 (0.02)    |
| DPY-<br>CD <sub>CH2</sub> | 3.03 (0.61)    | 3.44 (0.86)   | 3.70 (1.23)            | 3.01 (0.73) | 3.15 (0.77)    | 3.21 (0.78)    |
|                           | 4.01 (0.00)    | 4.14 (0.03)   | 4.27 (0.03)            | 4.07 (0.11) | 4.30 (0.12)    | 4.41 (0.12)    |
|                           |                | 4.80 (0.06)   | 4.97 (0.05)            | 4.64 (0.08) | 4.87 (0.09)    | 4.97 (0.10)    |
|                           |                | 5.07 (0.16)   | 5.29 (0.22)            | 4.89 (0.13) | 5.19 (0.16)    | 5.33 (0.18)    |
|                           |                | 5.65 (0.10)   | 5.87 (0.12)            | 5.42 (0.14) | 5.64 (0.14)    | 5.74 0.14)     |
| DPN-<br>CD <sub>min</sub> | 3.27 (0.03)    | 3.58 (0.00)   | 3.61 (0.00)            | 3.26 (0.00) | 3.61 (0.59)    | 3.68 (0.68)    |
|                           | 3.30 (0.68)    | 3.86 (0.65)   | 4.09 (0.76)            | 3.47 (0.62) | 3.64 (0.07)    | 3.82 (0.00)    |
|                           |                | 4.32 (0.19)   | 4.49 (0.41)            | 4.56 (0.23) | 4.78 (0.22)    | 4.88 (0.21)    |
|                           |                | 5.25 (0.05)   | 5.47 (0.06)            | 5.14 (0.08) | 5.30 (0.09)    | 5.38 (0.10)    |
|                           |                | 5.61(0.06)    | 5.79 (0.13)            | 5.59 (0.08) | 5.88 (0.10)    | 6.02 (0.10)    |
| DPN-<br>CD                | 3.25 (0.61)    | 3.74 (0.09)   | 3.78 (0.01)            | 3.37 (0.00) | 3.60 (0.59)    | 3.67 (0.62)    |
|                           | 3.39 (0.00)    | 3.79 (0.70)   | 3.90 (0.04)            | 3.43 (0.53) | 3.77 (0.00)    | 3.96 (0.00)    |
|                           |                | 3.81 (0.00)   | 4.00 (1.00)            | 3.94 (0.22) | 4.23 (0.21)    | 4.37 (0.20)    |
|                           |                | 4.68(0.07)    | 4.93 (0.09)            | 4.51 (0.11) | 4.69 (0.12)    | 4.77 (0.13)    |
|                           |                | 5.55 (0.11)   | 5.76 (0.16)            | 5.38 (0.11) | 5.69 (0.14)    | 5.84 (0.15)    |

**Table S2.** Vertical excitation energies (VET) in eV and oscillator strengths (f) for the models in the *E* isomer. The  $n\pi^*$  and  $\pi\pi^*$  transitions are shown in blue and black, respectively.

| Model                     | XMS-CASPT2  | CAM-B3LYP   | CAM-B3LYP (TDA) | ADC(2)      | SCS-ADC(2)  | SOS-ADC(2)  |
|---------------------------|-------------|-------------|-----------------|-------------|-------------|-------------|
|                           | VET (f)     | VET (f)     | VET (f)         | VET (f)     | VET (f)     | VET (f)     |
| DPY-<br>CD <sub>min</sub> | 3.62 (0.97) | 4.20 (0.87) | 4.46 (1.21)     | 3.71 (0.80) | 3.82 (0.83) | 3.86 (0.84) |
|                           | 4.78 (0.00) | 5.36 (0.00) | 5.47 (0.00)     | 5.21 (0.00) | 5.48 (0.01) | 5.60 (0.02) |
|                           |             | 5.66 (0.05) | 5.89 (0.03)     | 5.62 (0.12) | 5.80 (0.16) | 5.87 (0.16) |
|                           |             | 5.68 (0.10) | 5.92 (0.14)     | 5.64 (0.15) | 5.81 (0.13) | 5.91 (0.12) |
|                           |             | 6.98 (0.00) | 6.99 (0.00)     | 7.26 (0.00) | 7.50 (0.00) | 7.61 (0.00) |
| DPY-<br>CD                | 3.11 (0.78) | 3.73 (0.73) | 3.94 (1.01)     | 3.27 (0.63) | 3.39 (0.65) | 3.44 (0.66) |
|                           | 4.51 (0.07) | 4.89 (0.07) | 5.09 (0.09)     | 4.70 (0.11) | 4.93 (0.13) | 5.03 (0.14) |
|                           |             | 4.91 (0.07) | 5.12 (0.06)     | 4.75 (0.12) | 4.97 (0.13) | 5.08 (0.14) |
|                           |             | 5.49 (0.02) | 5.67 (0.05)     | 5.25 (0.04) | 5.54 (0.04) | 5.68 (0.04) |
|                           |             | 6.57 (0.00) | 6.60 (0.02)     | 6.50 (0.05) | 6.80 (0.02) | 6.95 (0.01) |
| DPY-<br>CD <sub>CH2</sub> | 2.89 (0.97) | 3.33 (0.96) | 3.60 (1.40)     | 2.88 (0.82) | 3.01 (0.85) | 3.07 (0.86) |
|                           | 3.87 (0.04) | 4.03 (0.04) | 4.17 (0.04)     | 3.98 (0.11) | 4.18 (0.11) | 4.28 (0.11) |
|                           |             | 4.68 (0.04) | 4.86 (0.04)     | 4.51 (0.09) | 4.76 (0.11) | 4.88 (0.12) |
|                           |             | 5.01 (0.01) | 5.21 (0.03)     | 4.76 (0.02) | 5.05 (0.02) | 5.18 (0.02) |
|                           |             | 5.49 (0.06) | 5.75 (0.07)     | 5.29 (0.05) | 5.49 (0.05) | 5.59 (0.06) |
| DPN-<br>CD <sub>min</sub> | 3.22 (0.00) | 3.51 (0.00) | 3.53 (0.00)     | 3.17 (0.00) | 3.54 (0.00) | 3.68 (0.79) |
|                           | 3.35 (0.88) | 3.89 (0.66) | 4.12 (0.71)     | 3.46 (0.72) | 3.61 (0.77) | 3.71 (0.00) |
|                           |             | 4.38 (0.33) | 4.58 (0.69)     | 4.62 (0.28) | 4.82 (0.26) | 4.91 (0.25) |
|                           |             | 5.25 (0.04) | 5.47 (0.06)     | 5.17 (0.10) | 5.35 (0.11) | 5.43 (0.12) |
|                           |             | 5.51 (0.02) | 5.68 (0.04)     | 5.41 (0.03) | 5.69 (0.04) | 5.83 (0.04) |
| DPN-<br>CD                | 3.07 (0.55) | 3.58 (0.54) | 3.71 (0.15)     | 3.24 (0.44) | 3.44 (0.52) | 3.53 (0.54) |
|                           | 3.31 (0.01) | 3.69 (0.00) | 3.76 (0.46)     | 3.29 (0.03) | 3.70 (0.00) | 3.89 (0.00) |
|                           |             | 3.82 (0.12) | 3.93 (0.25)     | 3.94 (0.15) | 4.25 (0.14) | 4.39 (0.14) |
|                           |             | 4.64 (0.07) | 4.88 (0.10)     | 4.49 (0.12) | 4.66 (0.13) | 4.73 (0.13) |
|                           |             | 5.33 (0.14) | 5.56 (0.18)     | 5.12 (0.13) | 5.43 (0.17) | 5.58 (0.18) |

### 3. Excited state relaxed scans

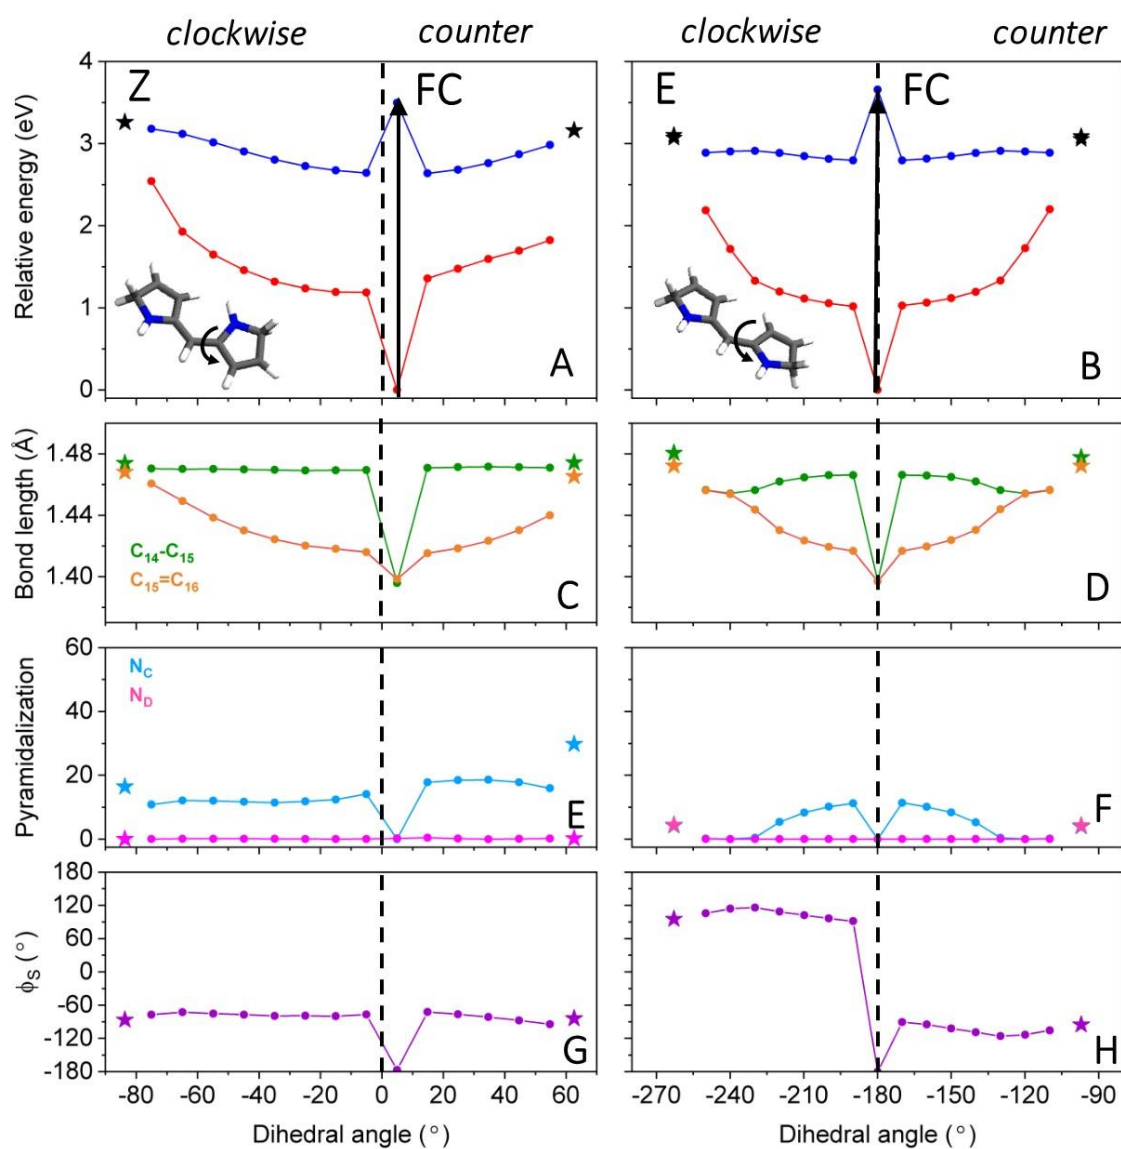

**Fig. S6.** Excited state relaxed scans of the DPY – CD<sub>min</sub> model. **A, B** Excited state and ground state energies of the Z and E isomer. **C, D** Changes of the C<sub>14</sub> – C<sub>15</sub> single bond and C<sub>15</sub> = C<sub>16</sub> double bond. **E, F** Pyramidalization angle at the N<sub>C</sub> and N<sub>D</sub> atoms. **G, H** Changes of the ϕ<sub>S</sub> dihedral angle. The star indicates the corresponding values at the MECI.

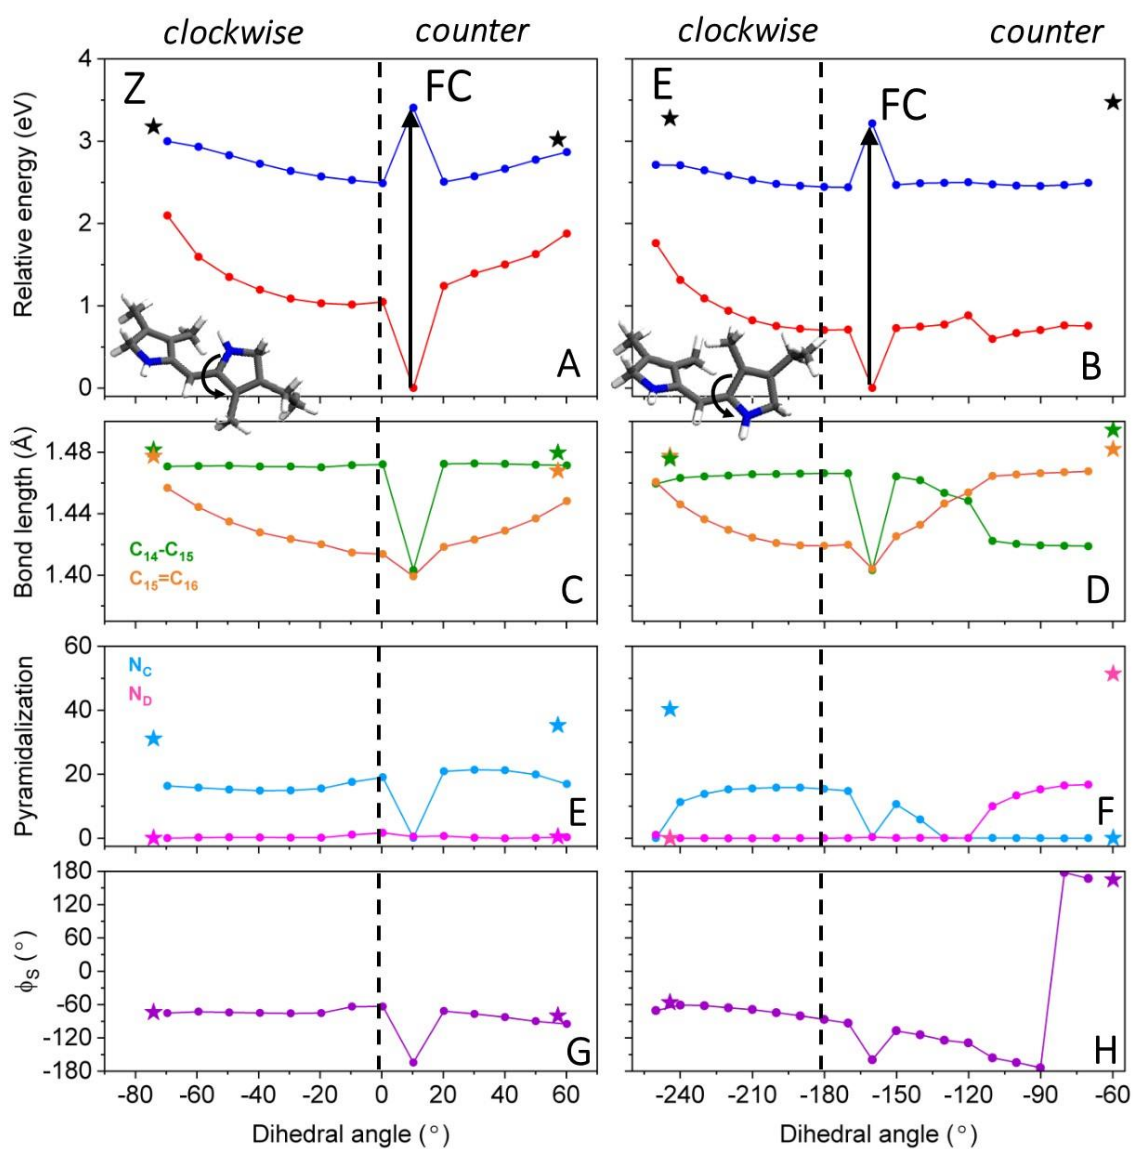

**Fig. S7.** Excited state relaxed scans of the DPY model. **A, B** Excited state and ground state energies of the *Z* and *E* isomer. **C, D** Changes of the  $C_{14} - C_{15}$  single bond and  $C_{15} = C_{16}$  double bond. **E, F** Pyramidalization angle at the  $N_C$  and  $N_D$  atoms. **G, H** Changes of the  $\phi_S$  dihedral angle. The star indicates the corresponding values at the MECI.



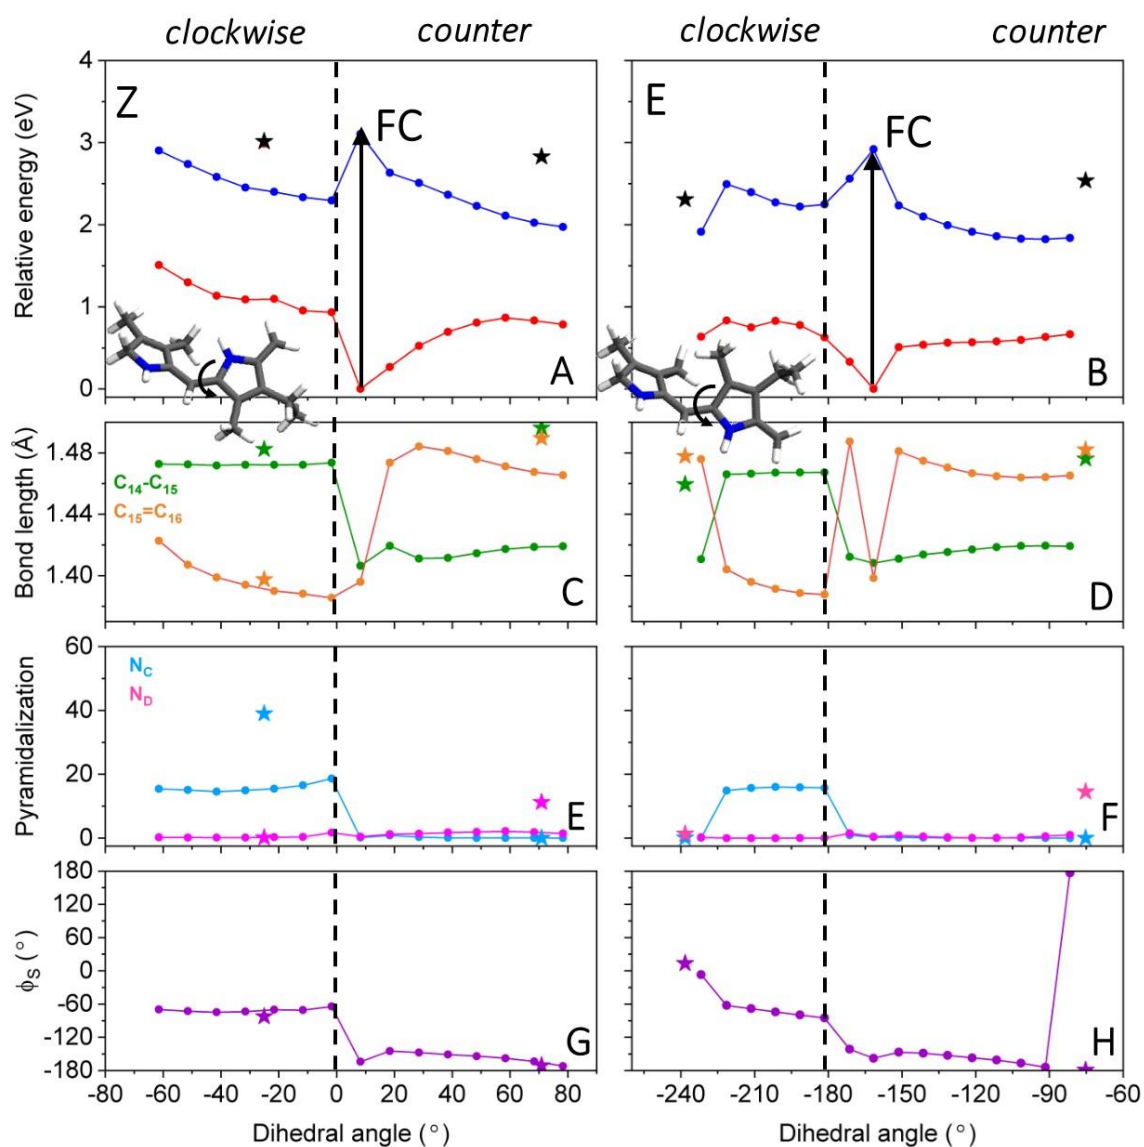

**Fig. S8.** Excited state relaxed scans of the DPY – CD<sub>CH<sub>2</sub></sub> model. **A, B** Excited state and ground state energies of the *Z* and *E* isomer. **C, D** Changes of the *C*<sub>14</sub> – *C*<sub>15</sub> single bond and *C*<sub>15</sub> = *C*<sub>16</sub> double bond. **E, F** Pyramidalization angle at the *N*<sub>*C*</sub> and *N*<sub>*D*</sub> atoms. **G, H** Changes of the  $\phi_S$  dihedral angle. The star indicates the corresponding values at the MECI.

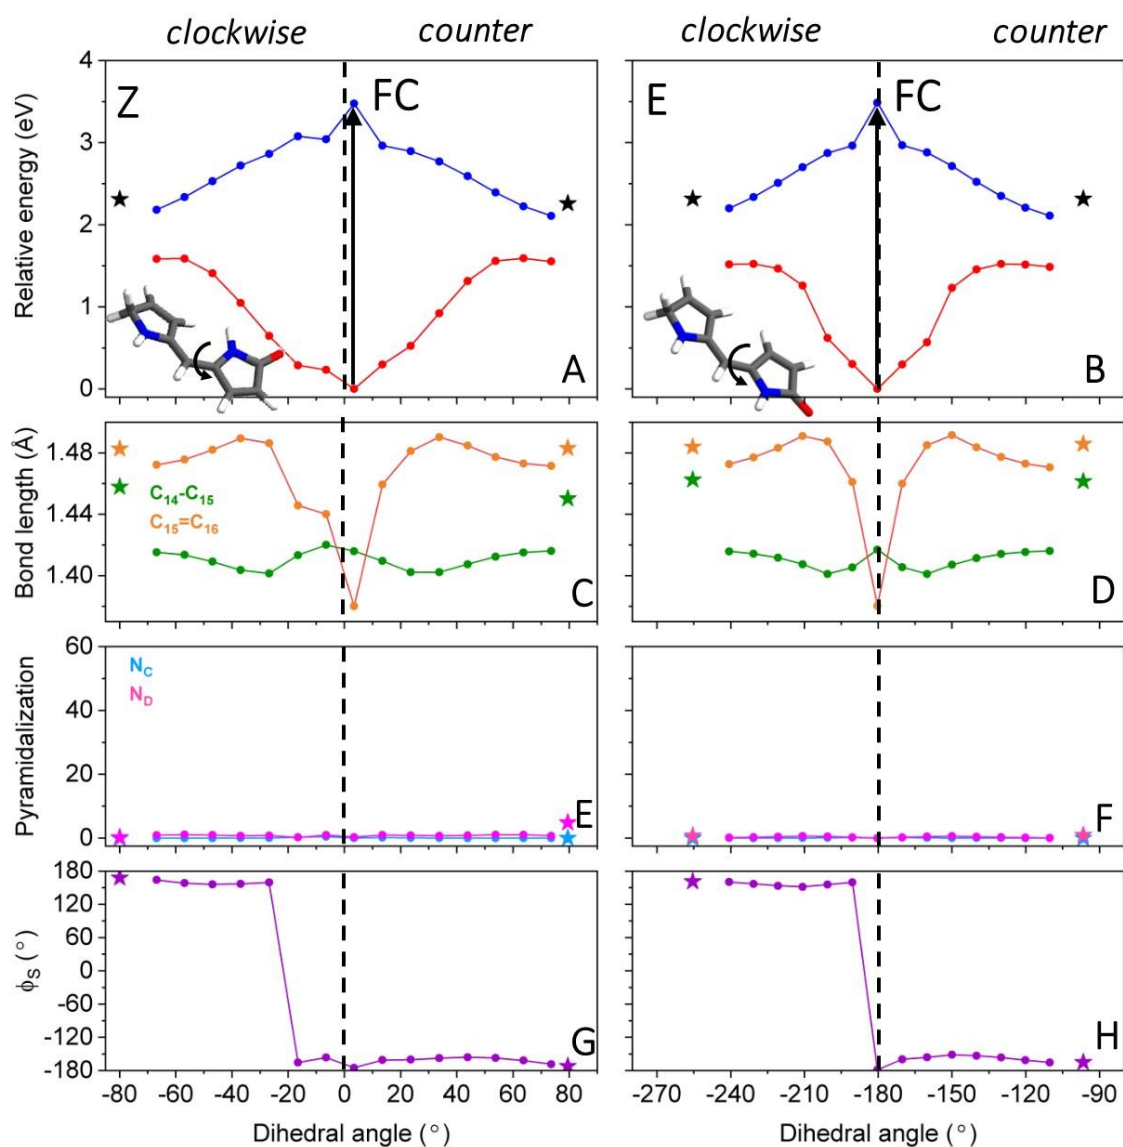

**Fig. S9.** Excited state relaxed scans of the DPN – CD<sub>min</sub> model. **A, B** Excited state and ground state energies of the *Z* and *E* isomer. **C, D** Changes of the  $C_{14} - C_{15}$  single bond and  $C_{15} = C_{16}$  double bond. **E, F** Pyramidalization angle at the  $N_C$  and  $N_D$  atoms. **G, H** Changes of the  $\phi_S$  dihedral angle. The star indicates the corresponding values at the MECI.

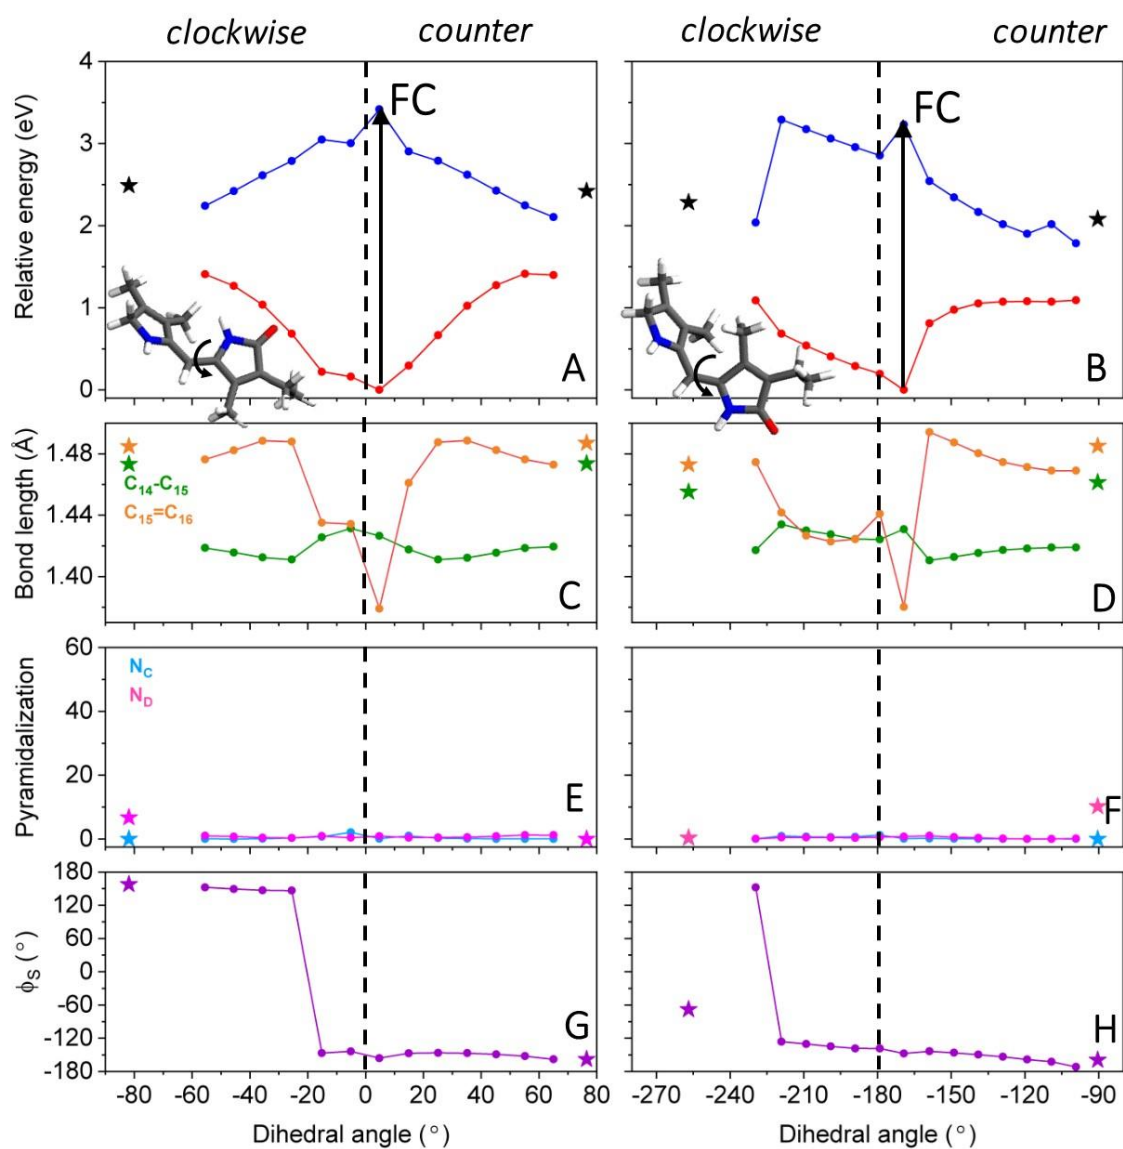

**Fig. S10.** Excited state relaxed scans of the DPN model. **A, B** Excited state and ground state energies of the *Z* and *E* isomer. **C, D** Changes of the C<sub>14</sub> – C<sub>15</sub> single bond and C<sub>15</sub> = C<sub>16</sub> double bond. **E, F** Pyramidalization angle at the N<sub>C</sub> and N<sub>D</sub> atoms. **G, H** Changes of the φ<sub>S</sub> dihedral angle. The star indicates the corresponding values at the MECI.

#### 4. Table of important parameters from LIICs

**Table S3.** Summary of important parameters computed at the MECIs for all the models in the Z conformation. “Cl” and “Co” stands for clockwise and counterclockwise directions respectively.

| Parameter                        | DPY<br>– CD <sub>min</sub> |      | DPY<br>– CD |      | DPY<br>– CD <sub>CH<sub>2</sub></sub> |       | DPN<br>– CD <sub>min</sub> |       | DPN<br>– CD |       |
|----------------------------------|----------------------------|------|-------------|------|---------------------------------------|-------|----------------------------|-------|-------------|-------|
|                                  | Cl.                        | Co.  | Cl.         | Co.  | Cl.                                   | Co.   | Cl.                        | Co.   | Cl.         | Co.   |
| $\phi_S$                         | -87°                       | -84° | -73°        | -80° | -83°                                  | -171° | 172°                       | -176° | -157°       | -158° |
| $\phi_D$                         | -84°                       | 63°  | -74°        | 57°  | -25°                                  | 71°   | -74°                       | 75°   | -82°        | 77°   |
| Barrier height<br>from LIIC (eV) | 0.47                       | 0.07 | 0.23        | 0.06 | 0.00                                  | 0.00  | 0.17                       | 0.00  | 1.53        | 0.00  |
| Pyramidalization<br>at C-ring    | 16°                        | 30°  | 31°         | 35°  | 39°                                   | 0°    | 0°                         | 0°    | 0           | 0°    |
| Pyramidalization<br>at D-ring    | 0°                         | 0°   | 0°          | 0°   | 0°                                    | 11°   | 15°                        | 16°   | 7°          | 0°    |

**Table S4.** Summary of important parameters computed at the MECIs and LIICs for all the models in the E conformation. “Cl” and “Co” stands for clockwise and counterclockwise directions respectively.

| Parameter                        | DPY<br>– CD <sub>min</sub> |      | DPY<br>– CD |      | DPY<br>– CD <sub>CH<sub>2</sub></sub> |       | DPN<br>– CD <sub>min</sub> |       | DPN<br>– CD |       |
|----------------------------------|----------------------------|------|-------------|------|---------------------------------------|-------|----------------------------|-------|-------------|-------|
|                                  | Cl.                        | Co.  | Cl.         | Co.  | Cl.                                   | Co.   | Cl.                        | Co.   | Cl.         | Co.   |
| $\phi_S$                         | 95°                        | -95° | -56°        | 164° | 13°                                   | -179° | 159°                       | -157° | -68°        | -159° |
| $\phi_D$                         | 97                         | -97  | 116°        | -60° | 122°                                  | -75°  | 107°                       | -89°  | 103°        | -90°  |
| Barrier height<br>from LIIC (eV) | 0.00                       | 0.00 | 0.34        | 0.34 | -                                     | -     | 0.00                       | 0.00  | 0.85        | 0.00  |
| Pyramidalization<br>at C-ring    | 4°                         | 4°   | 40°         | 0°   | 0°                                    | 0°    | 0°                         | 0°    | 0°          | 0°    |
| Pyramidalization<br>at D-ring    | 5°                         | 4°   | 51°         | 0°   | 1°                                    | 15°   | 0°                         | 18°   | 0°          | 10°   |
